# Supplementary material
Source: publisher figshare collection journal article supplement (https://frontiersin.figshare.com/ndownloader/files/17865965)
Supplement: Supplementary file 1 [file 17865965]

Supplementary Material

**Supplementary Figure 1** Nonmetric multidimensional scaling (NMDS) ordination of vegetation structural metrics from six sampling periods in independent bison units in the Nebraska Sandhills grassland. Ordinations were duplicated for each sampling period in each bison unit with color envelopes corresponding to functional patch types. Color envelopes for fire patches are red for the 2012 wildfire, blue for the 2012 prescribed fire, green for the 2013 prescribed fire, purple for the 2014 prescribed fire, yellow for the 2015 prescribed fire, and gray for the area unburned between 2012 and the end of the study. Color envelopes for topographic positions are red for north dunes, blue for south dunes, and green for interdunes. Stress values are included to show how well the ordination summarizes the observed distances among samples (stress >0.3 is a poor representation, 0.2-0.29 is acceptable, 0.1-0.19 is great, and <0.1 is excellent).

**Supplementary Figure 2** Nonmetric multidimensional scaling (NMDS) ordination of plant community composition over two years from independent bison units in the Nebraska Sandhills grassland. Ordinations were duplicated for each sampling year in each bison unit with color envelopes corresponding to functional patch types. Color envelopes for fire patches are red for the 2012 wildfire, blue for the 2012 prescribed fire, green for the 2013 prescribed fire, purple for the 2014 prescribed fire, yellow for the 2015 prescribed fire, and gray for the area unburned between 2012 and the end of the study. Color envelopes for topographic positions are red for north dunes, blue for south dunes, and green for interdunes. Stress values are included to show how well the

**Supplementary Table 1** Permutational Multivariate Analysis of Variance (PERMANOVA) and tests for multivariate homogeneity of dispersal for vegetation structural metrics temporally and spatially across scales in independent bison units in a Nebraska Sandhills grassland managed with patch burning. PERMANOVA compares the location of group centroids in ordination space. Multivariate homogeneity of group dispersions compares the average distance to group centroids among the different groups.

| Difference between bison units | | | | | |
| --- | --- | --- | --- | --- | --- |
|  | PERMANOVA | |  | Analysis of multivariate homogeneity of group dispersions | |
| Period | F | p-value |  | F | p-value |
| June 2014 | 0.46 | 0.81 |  | 0.32 | 0.55 |
| Aug. 2014 | 0.33 | 0.71 |  | 1.25 | 0.22 |
| Dec. 2014 | 0.64 | 0.52 |  | 0.96 | 0.30 |
| June 2015 | 0.09 | 0.85 |  | 0.03 | 0.87 |
| Aug. 2015 | 0.37 | 0.84 |  | 0.17 | 0.68 |
| Jan. 2016 | 1.00 | 0.51 |  | 1.21 | 0.34 |
|  |  |  |  |  |  |
| Difference among fire patches | | | | | |
|  | PERMANOVA | |  | Analysis of multivariate homogeneity of group dispersions | |
| Period | F | p-value |  | F | p-value |
| June 2014 | 3.29 | 0.11 |  | 2.18E+29 | 0.01 |
| Aug. 2014 | 3.290484 | 0.12 |  | 4.00E+17 | <0.001 |
| Dec. 2014 | 1.99 | 0.19 |  | 3.22E+29 | 0.01 |
| June 2015 | 5.62 | 0.12 |  | 3.77E+28 | 0.02 |
| Aug. 2015 | 6.52 | 0.01 |  | 1.98E+30 | 0.02 |
| Jan. 2016 | 0.81 | 0.46 |  | 1.09E+30 | 0.03 |
|  |  |  |  |  |  |
| Difference among topographic positions | | | | | |
|  | PERMANOVA | |  | Analysis of multivariate homogeneity of group dispersions | |
| Period | F | p-value |  | F | p-value |
| June 2014 | 2.30 | 0.11 |  | 0.10 | 0.88 |
| Aug. 2014 | 2.44 | 0.10 |  | 0.02 | 0.96 |
| Dec. 2014 | 3.48 | 0.05 |  | 0.03 | 0.97 |
| June 2015 | 1.31 | 0.31 |  | 0.03 | 0.99 |
| Aug. 2015 | 1.26 | 0.26 |  | 0.01 | 1.00 |
| Jan. 2016 | 0.62 | 0.43 |  | 0.19 | 0.78 |
|  |  |  |  |  |  |
| Difference between bison units | | | | | |
|  | PERMANOVA | |  | Analysis of multivariate homogeneity of group dispersions | |
| Year | F | p-value |  | F | p-value |
| 2014 | 0.07 | 0.90 |  | 0.90 | 0.31 |
| 2015 | 0.12 | 0.86 |  | 0.09 | 0.77 |
|  |  |  |  |  |  |
| Difference among fire patches | | | | | |
|  | PERMANOVA | |  | Analysis of multivariate homogeneity of group dispersions | |
| Year | F | p-value |  | F | p-value |
| 2014 | 0.83 | 0.42 |  | 0.36 | 0.87 |
| 2015 | 0.65 | 0.40 |  | 0.07 | 0.99 |
|  |  |  |  |  |  |
| Difference among topographic positions | | | | | |
|  | PERMANOVA | |  | Analysis of multivariate homogeneity of group dispersions | |
| Year | F | p-value |  | F | p-value |
| 2014 | 2.19 | 0.11 |  | 0.00 | 0.99 |
| 2015 | 0.70 | 0.38 |  | 0.02 | 0.98 |
|  |  |  |  |  |  |
| Difference among fire patches in the East Bison Unit | | | | | |
|  | PERMANOVA | |  | Analysis of multivariate homogeneity of group dispersions | |
| Year | F | p-value |  | F | p-value |
| 2014 | 0.10 | 0.85 |  | 0.01 | 0.93 |
| 2015 | 0.23 | 0.50 |  | 0.02 | 0.72 |
|  |  |  |  |  |  |
| Difference among topographic positions | | | | | |
|  | PERMANOVA | |  | Analysis of multivariate homogeneity of group dispersions | |
| Year | F | p-value |  | F | p-value |
| 2014 | 1.69 | 0.20 |  | 0.01 | 0.96 |
| 2015 | 0.25 | 0.70 |  | 0.00 | 0.98 |
|  |  |  |  |  |  |
| Difference among fire patches in the West Bison Unit | | | | | |
|  | PERMANOVA | |  | Analysis of multivariate homogeneity of group dispersions | |
| Year | F | p-value |  | F | p-value |
| 2014 | 2.69 | 0.11 |  | 0.64 | 0.61 |
| 2015 | 1.30 | 0.31 |  | 0.36 | 0.77 |
|  |  |  |  |  |  |
| Difference among topographic positions | | | | | |
|  | PERMANOVA | |  | Analysis of multivariate homogeneity of group dispersions | |
| Year | F | p-value |  | F | p-value |
| 2014 | 0.69 | 0.53 |  | 0.00 | 1.00 |
| 2015 | 0.44 | 0.61 |  | 0.05 | 0.94 |

**Supplementary Table 2** Multiple comparisons for differences in multivariate homogeneity of dispersal for vegetation structural metrics across fire patches in a Nebraska Sandhills grassland managed with patch burning and bison grazing. The only significant difference in structural data occurred in the differences of dispersal of data (the average distance to group centroids) among the fire patche. Prescribed fires are abbreviated to RX for respective years. 2012WF is the 2012 Fairfield Creek Wildfire.

|  |  | diff | lwr | upr | p-adj |
| --- | --- | --- | --- | --- | --- |
| June 2014 | 2012RX:Unburned | -0.16 | -0.17 | -0.14 | **<0.001** |
|  | 2012WF:Unburned | -0.17 | -0.18 | -0.15 | **<0.001** |
|  | 2013RX:Unburned | -0.15 | -0.16 | -0.14 | **<0.001** |
|  | 2012WF:2012RX | -0.01 | -0.02 | 0.00 | 0.13 |
|  | 2013RX:2012RX | 0.00 | -0.01 | 0.02 | 0.81 |
|  | 2013RX:2012WF | 0.01 | 0.00 | 0.03 | **0.04** |
|  |  |  |  |  |  |
| Aug. 2014 | 2012RX:Unburned | -0.14 | -0.15 | -0.13 | **<0.001** |
|  | 2012WF:Unburned | -0.15 | -0.16 | -0.14 | **<0.001** |
|  | 2013RX:Unburned | -0.14 | -0.16 | -0.13 | **<0.001** |
|  | 2012WF:2012RX | -0.01 | -0.02 | 0.00 | 0.10 |
|  | 2013RX:2012RX | 0.00 | -0.01 | 0.01 | 0.93 |
|  | 2013RX:2012WF | 0.01 | -0.01 | 0.02 | 0.44 |
|  |  |  |  |  |  |
| Dec. 2014 | 2012RX:Unburned | -0.15 | -0.16 | -0.13 | **<0.001** |
|  | 2012WF:Unburned | -0.15 | -0.16 | -0.13 | **<0.001** |
|  | 2013RX:Unburned | -0.14 | -0.15 | -0.13 | **<0.001** |
|  | 2014RX:Unburned | -0.02 | -0.03 | -0.01 | **0.00** |
|  | 2012WF:2012RX | 0.00 | -0.01 | 0.01 | 1.00 |
|  | 2013RX:2012RX | 0.01 | -0.01 | 0.02 | 0.80 |
|  | 2014RX:2012RX | 0.13 | 0.11 | 0.14 | **<0.001** |
|  | 2013RX:2012WF | 0.01 | -0.01 | 0.02 | 0.87 |
|  | 2014RX:2012WF | 0.13 | 0.11 | 0.14 | **<0.001** |
|  | 2014RX:2013RX | 0.12 | 0.11 | 0.14 | **<0.001** |
|  |  |  |  |  |  |
| June 2015 | 2012RX:Unburned | -0.15 | -0.16 | -0.13 | **<0.001** |
|  | 2012WF:Unburned | -0.15 | -0.16 | -0.13 | **<0.001** |
|  | 2013RX:Unburned | -0.14 | -0.15 | -0.13 | **<0.001** |
|  | 2014RX:Unburned | -0.02 | -0.03 | -0.01 | **0.00** |
|  | 2012WF:2012RX | 0.00 | -0.01 | 0.01 | 1.00 |
|  | 2013RX:2012RX | 0.01 | -0.01 | 0.02 | 0.80 |
|  | 2014RX:2012RX | 0.13 | 0.11 | 0.14 | **<0.001** |
|  | 2013RX:2012WF | 0.01 | -0.01 | 0.02 | 0.87 |
|  | 2014RX:2012WF | 0.13 | 0.11 | 0.14 | **<0.001** |
|  | 2014RX:2013RX | 0.12 | 0.11 | 0.14 | **<0.001** |
|  |  |  |  |  |  |
| Aug. 2015 | 2012RX:Unburned | -0.17 | -0.18 | -0.16 | **<0.001** |
|  | 2012WF:Unburned | -0.17 | -0.18 | -0.16 | **<0.001** |
|  | 2013RX:Unburned | -0.17 | -0.18 | -0.15 | **<0.001** |
|  | 2014RX:Unburned | -0.11 | -0.12 | -0.10 | **<0.001** |
|  | 2015RX:Unburned | -0.10 | -0.11 | -0.09 | **<0.001** |
|  | 2012WF:2012RX | 0.00 | -0.01 | 0.01 | 0.83 |
|  | 2013RX:2012RX | 0.00 | -0.01 | 0.01 | 1.00 |
|  | 2014RX:2012RX | 0.06 | 0.05 | 0.06 | **<0.001** |
|  | 2015RX:2012RX | 0.07 | 0.06 | 0.08 | **<0.001** |
|  | 2013RX:2012WF | 0.00 | -0.01 | 0.02 | 0.94 |
|  | 2014RX:2012WF | 0.06 | 0.05 | 0.07 | **<0.001** |
|  | 2015RX:2012WF | 0.07 | 0.06 | 0.08 | **<0.001** |
|  | 2014RX:2013RX | 0.06 | 0.04 | 0.07 | **<0.001** |
|  | 2015RX:2013RX | 0.07 | 0.06 | 0.08 | **<0.001** |
|  | 2015RX:2014RX | 0.02 | 0.01 | 0.02 | **<0.001** |
|  |  |  |  |  |  |
| Jan. 2016 | 2012RX:Unburned | -0.24 | -0.25 | -0.23 | **<0.001** |
|  | 2012WF:Unburned | -0.25 | -0.27 | -0.24 | **<0.001** |
|  | 2013RX:Unburned | -0.25 | -0.27 | -0.24 | **<0.001** |
|  | 2014RX:Unburned | -0.20 | -0.22 | -0.19 | **<0.001** |
|  | 2015RX:Unburned | -0.22 | -0.24 | -0.21 | **<0.001** |
|  | 2012WF:2012RX | -0.01 | -0.03 | 0.00 | **0.02** |
|  | 2013RX:2012RX | -0.01 | -0.03 | 0.00 | **0.03** |
|  | 2014RX:2012RX | 0.04 | 0.02 | 0.05 | **<0.001** |
|  | 2015RX:2012RX | 0.02 | 0.01 | 0.03 | **<0.001** |
|  | 2013RX:2012WF | 0.00 | -0.01 | 0.02 | 1.00 |
|  | 2014RX:2012WF | 0.05 | 0.04 | 0.06 | **<0.001** |
|  | 2015RX:2012WF | 0.03 | 0.02 | 0.04 | **<0.001** |
|  | 2014RX:2013RX | 0.05 | 0.03 | 0.06 | **<0.001** |
|  | 2015RX:2013RX | 0.03 | 0.02 | 0.04 | **<0.001** |
|  | 2015RX:2014RX | -0.02 | -0.03 | -0.01 | **<0.001** |

|  |  | diff | lwr | upr | p-adj |
| --- | --- | --- | --- | --- | --- |
| June 2014 | 2012RX:Unburned | -0.16 | -0.17 | -0.14 | <0.001 |
|  | 2012WF:Unburned | -0.17 | -0.18 | -0.15 | <0.001 |
|  | 2013RX:Unburned | -0.15 | -0.16 | -0.14 | <0.001 |
|  | 2012WF:2012RX | -0.01 | -0.02 | 0.00 | 0.13 |
|  | 2013RX:2012RX | 0.00 | -0.01 | 0.02 | 0.81 |
|  | 2013RX:2012WF | 0.01 | 0.00 | 0.03 | 0.04 |
|  |  |  |  |  |  |
| Aug. 2014 | 2012RX:Unburned | -0.14 | -0.15 | -0.13 | <0.001 |
|  | 2012WF:Unburned | -0.15 | -0.16 | -0.14 | <0.001 |
|  | 2013RX:Unburned | -0.14 | -0.16 | -0.13 | <0.001 |
|  | 2012WF:2012RX | -0.01 | -0.02 | 0.00 | 0.10 |
|  | 2013RX:2012RX | 0.00 | -0.01 | 0.01 | 0.93 |
|  | 2013RX:2012WF | 0.01 | -0.01 | 0.02 | 0.44 |
|  |  |  |  |  |  |
| Dec. 2014 | 2012RX:Unburned | -0.15 | -0.16 | -0.13 | <0.001 |
|  | 2012WF:Unburned | -0.15 | -0.16 | -0.13 | <0.001 |
|  | 2013RX:Unburned | -0.14 | -0.15 | -0.13 | <0.001 |
|  | 2014RX:Unburned | -0.02 | -0.03 | -0.01 | 0.00 |
|  | 2012WF:2012RX | 0.00 | -0.01 | 0.01 | 1.00 |
|  | 2013RX:2012RX | 0.01 | -0.01 | 0.02 | 0.80 |
|  | 2014RX:2012RX | 0.13 | 0.11 | 0.14 | <0.001 |
|  | 2013RX:2012WF | 0.01 | -0.01 | 0.02 | 0.87 |
|  | 2014RX:2012WF | 0.13 | 0.11 | 0.14 | <0.001 |
|  | 2014RX:2013RX | 0.12 | 0.11 | 0.14 | <0.001 |
|  |  |  |  |  |  |
| June 2015 | 2012RX:Unburned | -0.15 | -0.16 | -0.13 | <0.001 |
|  | 2012WF:Unburned | -0.15 | -0.16 | -0.13 | <0.001 |
|  | 2013RX:Unburned | -0.14 | -0.15 | -0.13 | <0.001 |
|  | 2014RX:Unburned | -0.02 | -0.03 | -0.01 | 0.00 |
|  | 2012WF:2012RX | 0.00 | -0.01 | 0.01 | 1.00 |
|  | 2013RX:2012RX | 0.01 | -0.01 | 0.02 | 0.80 |
|  | 2014RX:2012RX | 0.13 | 0.11 | 0.14 | <0.001 |
|  | 2013RX:2012WF | 0.01 | -0.01 | 0.02 | 0.87 |
|  | 2014RX:2012WF | 0.13 | 0.11 | 0.14 | <0.001 |
|  | 2014RX:2013RX | 0.12 | 0.11 | 0.14 | <0.001 |
|  |  |  |  |  |  |
| Aug. 2015 | 2012RX:Unburned | -0.17 | -0.18 | -0.16 | <0.001 |
|  | 2012WF:Unburned | -0.17 | -0.18 | -0.16 | <0.001 |
|  | 2013RX:Unburned | -0.17 | -0.18 | -0.15 | <0.001 |
|  | 2014RX:Unburned | -0.11 | -0.12 | -0.10 | <0.001 |
|  | 2015RX:Unburned | -0.10 | -0.11 | -0.09 | <0.001 |
|  | 2012WF:2012RX | 0.00 | -0.01 | 0.01 | 0.83 |
|  | 2013RX:2012RX | 0.00 | -0.01 | 0.01 | 1.00 |
|  | 2014RX:2012RX | 0.06 | 0.05 | 0.06 | <0.001 |
|  | 2015RX:2012RX | 0.07 | 0.06 | 0.08 | <0.001 |
|  | 2013RX:2012WF | 0.00 | -0.01 | 0.02 | 0.94 |
|  | 2014RX:2012WF | 0.06 | 0.05 | 0.07 | <0.001 |
|  | 2015RX:2012WF | 0.07 | 0.06 | 0.08 | <0.001 |
|  | 2014RX:2013RX | 0.06 | 0.04 | 0.07 | <0.001 |
|  | 2015RX:2013RX | 0.07 | 0.06 | 0.08 | <0.001 |
|  | 2015RX:2014RX | 0.02 | 0.01 | 0.02 | <0.001 |
|  |  |  |  |  |  |
| Jan. 2016 | 2012RX:Unburned | -0.24 | -0.25 | -0.23 | <0.001 |
|  | 2012WF:Unburned | -0.25 | -0.27 | -0.24 | <0.001 |
|  | 2013RX:Unburned | -0.25 | -0.27 | -0.24 | <0.001 |
|  | 2014RX:Unburned | -0.20 | -0.22 | -0.19 | <0.001 |
|  | 2015RX:Unburned | -0.22 | -0.24 | -0.21 | <0.001 |
|  | 2012WF:2012RX | -0.01 | -0.03 | 0.00 | 0.02 |
|  | 2013RX:2012RX | -0.01 | -0.03 | 0.00 | 0.03 |
|  | 2014RX:2012RX | 0.04 | 0.02 | 0.05 | <0.001 |
|  | 2015RX:2012RX | 0.02 | 0.01 | 0.03 | <0.001 |
|  | 2013RX:2012WF | 0.00 | -0.01 | 0.02 | 1.00 |
|  | 2014RX:2012WF | 0.05 | 0.04 | 0.06 | <0.001 |
|  | 2015RX:2012WF | 0.03 | 0.02 | 0.04 | <0.001 |
|  | 2014RX:2013RX | 0.05 | 0.03 | 0.06 | <0.001 |
|  | 2015RX:2013RX | 0.03 | 0.02 | 0.04 | <0.001 |
|  | 2015RX:2014RX | -0.02 | -0.03 | -0.01 | <0.001 |

|  |  | diff | lwr | upr | p-adj |
| --- | --- | --- | --- | --- | --- |
| June 2014 | 2012RX:Unburned | -0.16 | -0.17 | -0.14 | **<0.001** |
|  | 2012WF:Unburned | -0.17 | -0.18 | -0.15 | **<0.001** |
|  | 2013RX:Unburned | -0.15 | -0.16 | -0.14 | **<0.001** |
|  | 2012WF:2012RX | -0.01 | -0.02 | 0.00 | 0.13 |
|  | 2013RX:2012RX | 0.00 | -0.01 | 0.02 | 0.81 |
|  | 2013RX:2012WF | 0.01 | 0.00 | 0.03 | **0.04** |
|  |  |  |  |  |  |
| Aug. 2014 | 2012RX:Unburned | -0.14 | -0.15 | -0.13 | **<0.001** |
|  | 2012WF:Unburned | -0.15 | -0.16 | -0.14 | **<0.001** |
|  | 2013RX:Unburned | -0.14 | -0.16 | -0.13 | **<0.001** |
|  | 2012WF:2012RX | -0.01 | -0.02 | 0.00 | 0.10 |
|  | 2013RX:2012RX | 0.00 | -0.01 | 0.01 | 0.93 |
|  | 2013RX:2012WF | 0.01 | -0.01 | 0.02 | 0.44 |
|  |  |  |  |  |  |
| Dec. 2014 | 2012RX:Unburned | -0.15 | -0.16 | -0.13 | **<0.001** |
|  | 2012WF:Unburned | -0.15 | -0.16 | -0.13 | **<0.001** |
|  | 2013RX:Unburned | -0.14 | -0.15 | -0.13 | **<0.001** |
|  | 2014RX:Unburned | -0.02 | -0.03 | -0.01 | **0.00** |
|  | 2012WF:2012RX | 0.00 | -0.01 | 0.01 | 1.00 |
|  | 2013RX:2012RX | 0.01 | -0.01 | 0.02 | 0.80 |
|  | 2014RX:2012RX | 0.13 | 0.11 | 0.14 | **<0.001** |
|  | 2013RX:2012WF | 0.01 | -0.01 | 0.02 | 0.87 |
|  | 2014RX:2012WF | 0.13 | 0.11 | 0.14 | **<0.001** |
|  | 2014RX:2013RX | 0.12 | 0.11 | 0.14 | **<0.001** |
|  |  |  |  |  |  |
| June 2015 | 2012RX:Unburned | -0.15 | -0.16 | -0.13 | **<0.001** |
|  | 2012WF:Unburned | -0.15 | -0.16 | -0.13 | **<0.001** |
|  | 2013RX:Unburned | -0.14 | -0.15 | -0.13 | **<0.001** |
|  | 2014RX:Unburned | -0.02 | -0.03 | -0.01 | **0.00** |
|  | 2012WF:2012RX | 0.00 | -0.01 | 0.01 | 1.00 |
|  | 2013RX:2012RX | 0.01 | -0.01 | 0.02 | 0.80 |
|  | 2014RX:2012RX | 0.13 | 0.11 | 0.14 | **<0.001** |
|  | 2013RX:2012WF | 0.01 | -0.01 | 0.02 | 0.87 |
|  | 2014RX:2012WF | 0.13 | 0.11 | 0.14 | **<0.001** |
|  | 2014RX:2013RX | 0.12 | 0.11 | 0.14 | **<0.001** |
|  |  |  |  |  |  |
| Aug. 2015 | 2012RX:Unburned | -0.17 | -0.18 | -0.16 | **<0.001** |
|  | 2012WF:Unburned | -0.17 | -0.18 | -0.16 | **<0.001** |
|  | 2013RX:Unburned | -0.17 | -0.18 | -0.15 | **<0.001** |
|  | 2014RX:Unburned | -0.11 | -0.12 | -0.10 | **<0.001** |
|  | 2015RX:Unburned | -0.10 | -0.11 | -0.09 | **<0.001** |
|  | 2012WF:2012RX | 0.00 | -0.01 | 0.01 | 0.83 |
|  | 2013RX:2012RX | 0.00 | -0.01 | 0.01 | 1.00 |
|  | 2014RX:2012RX | 0.06 | 0.05 | 0.06 | **<0.001** |
|  | 2015RX:2012RX | 0.07 | 0.06 | 0.08 | **<0.001** |
|  | 2013RX:2012WF | 0.00 | -0.01 | 0.02 | 0.94 |
|  | 2014RX:2012WF | 0.06 | 0.05 | 0.07 | **<0.001** |
|  | 2015RX:2012WF | 0.07 | 0.06 | 0.08 | **<0.001** |
|  | 2014RX:2013RX | 0.06 | 0.04 | 0.07 | **<0.001** |
|  | 2015RX:2013RX | 0.07 | 0.06 | 0.08 | **<0.001** |
|  | 2015RX:2014RX | 0.02 | 0.01 | 0.02 | **<0.001** |
|  |  |  |  |  |  |
| Jan. 2016 | 2012RX:Unburned | -0.24 | -0.25 | -0.23 | **<0.001** |
|  | 2012WF:Unburned | -0.25 | -0.27 | -0.24 | **<0.001** |
|  | 2013RX:Unburned | -0.25 | -0.27 | -0.24 | **<0.001** |
|  | 2014RX:Unburned | -0.20 | -0.22 | -0.19 | **<0.001** |
|  | 2015RX:Unburned | -0.22 | -0.24 | -0.21 | **<0.001** |
|  | 2012WF:2012RX | -0.01 | -0.03 | 0.00 | **0.02** |
|  | 2013RX:2012RX | -0.01 | -0.03 | 0.00 | **0.03** |
|  | 2014RX:2012RX | 0.04 | 0.02 | 0.05 | **<0.001** |
|  | 2015RX:2012RX | 0.02 | 0.01 | 0.03 | **<0.001** |
|  | 2013RX:2012WF | 0.00 | -0.01 | 0.02 | 1.00 |
|  | 2014RX:2012WF | 0.05 | 0.04 | 0.06 | **<0.001** |
|  | 2015RX:2012WF | 0.03 | 0.02 | 0.04 | **<0.001** |
|  | 2014RX:2013RX | 0.05 | 0.03 | 0.06 | **<0.001** |
|  | 2015RX:2013RX | 0.03 | 0.02 | 0.04 | **<0.001** |
|  | 2015RX:2014RX | -0.02 | -0.03 | -0.01 | **<0.001** |

**Supplementary Table 3** Permutational Multivariate Analysis of Variance (PERMANOVA) of plant community composition data between bison units, temporally and spatially discrete fire patches, and topographic positions in independent bison units in a Nebraska Sandhills grassland managed with patch burning.

| Difference between bison units | | | | | | | |
| --- | --- | --- | --- | --- | --- | --- | --- |
|  | PERMANOVA | |  | | Analysis of multivariate homogeneity of group dispersions | | |
| Year | F | p-value | |  | | F | p-value | |
| 2014 | 0.75 | 0.70 | |  | | 0.54 | 0.55 | |
| 2015 | 0.64 | 0.68 | |  | | 0.02 | 0.87 | |
|  |  |  | |  | |  |  | |
| Difference among fire patches | | | | | | | |
|  | PERMANOVA | |  | | Analysis of multivariate homogeneity of group dispersions | | |
| Year | F | p-value | |  | | F | p-value | |
| 2014 | 4.95 | 0.00 | |  | | 2.72 | 0.11 | |
| 2015 | 3.47 | 0.02 | |  | | 0.65 | 0.53 | |
|  |  |  | |  | |  |  | |
| Difference among topographic positions | | | | | | | |
|  | PERMANOVA | |  | | Analysis of multivariate homogeneity of group dispersions | | |
| Year | F | p-value | |  | | F | p-value | |
| 2014 | 1.13 | 0.37 | |  | | 0.13 | 0.88 | |
| 2015 | 2.38 | 0.03 | |  | | 3.48 | 0.07 | |
